# Supplementary material for: C911: A Bench-Level Control for Sequence Specific siRNA Off-Target Effects
Source: PLoS One. 2012 Dec 14;7(12):e51942. doi: 10.1371/journal.pone.0051942 (PMC3522603; doi:10.1371/journal.pone.0051942)
Supplement: Data S1 — Experimental Data. Excel spreadsheet containing sheets for the selected siRNAs, the synthesized sequences, and the experimental results plotted in Figure 3 . (XLSX) [file pone.0051942.s001.xlsx]

## Sheet: Gold Standard Picks
Target Gene	Hugo	Guide Strand (anti-sense)	Hexamer Seed Sequence (base 2-7 of guide strand)	Luciferase Activity (As Percent of Nagative Control)	Median Percent Luciferase Activity of all siRNA with this seed	p-value of ks-test that siRNAs with this seed have a bias towards down-regulation	q-value (BH-FDR)	Off-Target (q-value < .01)	Luciferase Activity of siRNA.2	Luciferase Activity of siRNA.3	Selection	Original Sequnce (sense)	C10 (Complement of base 10)	C9.11 (Complement of bases 9 through 11)	Scrambled	Name
POLR2A	POLR2A	AATAGTATGACCCTCGATG	ATAGTA	3.70973	76.2916	0.035105	0.139579	FALSE	17.0672	47.2738	True Positive	CAUCGAGGGUCAUACUAUUtt	CAUCGAGGGACAUACUAUUtt	CAUCGAGGCAGAUACUAUUtt	GGUAAACGCGUAUUUCACUtt	polymerase (RNA) II (DNA directed) polypeptide A, 220kDa
POLR2B	POLR2B	AATCTGACAATCTCGTTCC	ATCTGA	13.7612	73.5396	0.0016368	0.0151249	FALSE	18.2781	55.9102	True Positive	GGAACGAGAUUGUCAGAUUtt	GGAACGAGAAUGUCAGAUUtt	GGAACGAGUAAGUCAGAUUtt	GCGUGGGAAACUUAGUAAUtt	polymerase (RNA) II (DNA directed) polypeptide B, 140kDa
POLR2J3	POLR2J3	TGAATAAACAGGCATTGGG	GAATAA	17.2065	77.7472	0.123575	0.339774	FALSE	11.7806	23.821	True Positive	CCCAAUGCCUGUUUAUUCAtt	CCCAAUGCCAGUUUAUUCAtt	CCCAAUGCGACUUUAUUCAtt	GCUAUCUCGUUCUACACUAtt	polymerase (RNA) II (DNA directed) polypeptide J3
PCF11	PCF11	ATGATTATCAGGATATGCC	TGATTA	14.5664	103.462	0.842437	1	FALSE	18.9273	34.7095	True Positive	GGCAUAUCCUGAUAAUCAUtt	GGCAUAUCCAGAUAAUCAUtt	GGCAUAUCGACAUAAUCAUtt	GAUUACCGUCGUCAAUAUAtt	PCF11, cleavage and polyadenylation factor subunit, homolog (S. cerevisiae)
RPS27A	RPS27A	AGTGGTGTAAGACTTCTTC	GTGGTG	17.7192	65.7697	0.0614973	0.209071	FALSE	25.4243	42.3634	True Positive	GAAGAAGUCUUACACCACUtt	GAAGAAGUCAUACACCACUtt	GAAGAAGUGAAACACCACUtt	GGUCAUUAACCGCUAACAAtt	ribosomal protein S27a
POLR2I	POLR2I	ATCTTGTTGACATAGATGC	TCTTGT	17.2849	84.4136	0.0715899	0.231344	FALSE	25.2317	53.0894	True Positive	GCAUCUAUGUCAACAAGAUtt	GCAUCUAUGACAACAAGAUtt	GCAUCUAUCAGAACAAGAUtt	GUACCAUACAGACUAGUUAtt	polymerase (RNA) II (DNA directed) polypeptide I, 14.5kDa
POLR2D	POLR2D	TTCTGGAGTAGCAAGCTAC	TCTGGA	23.5087	79.0009	0.213147	0.497699	FALSE	17.195	15.0181	True Positive	GUAGCUUGCUACUCCAGAAtt	GUAGCUUGCAACUCCAGAAtt	GUAGCUUGGAUCUCCAGAAtt	GCUAGCCACGUCAAUGUAUtt	polymerase (RNA) II (DNA directed) polypeptide D
EIF2S3	EIF2S3	AGATCTAATAACAATAAGC	GATCTA	21.9584	71.3873	0.0052343	0.0350787	FALSE	28.6511	62.9346	True Positive	GCUUAUUGUUAUUAGAUCUtt	GCUUAUUGUAAUUAGAUCUtt	GCUUAUUGAAUUUAGAUCUtt	GGAUUUCUAUACGUUUAUUtt	eukaryotic translation initiation factor 2, subunit 3 gamma, 52kDa
SON	SON	AACGGTCTCACTAAATCTG	ACGGTC	20.1201	58.7166	0.0248643	0.107593	FALSE	27.4215	29.5375	True Positive	CAGAUUUAGUGAGACCGUUtt	CAGAUUUAGAGAGACCGUUtt	CAGAUUUACACAGACCGUUtt	GGCAUACCGAUUGUAGUUAtt	SON DNA binding protein
RPL36	RPL36	TTCAGTAACTCCATGGCGC	TCAGTA	20.9179	58.1292	0.0050271	0.0341693	FALSE	27.5894	35.8324	True Positive	GCGCCAUGGAGUUACUGAAtt	GCGCCAUGGUGUUACUGAAtt	GCGCCAUGCUCUUACUGAAtt	GAGGGUACUCGACUACUGAtt	ribosomal protein L36
hCG_1989844	NA	TAGGCATCGAAGACGCTCG	AGGCAT	13.5586	25.2342	1.70248e-11	3.10702e-09	TRUE	26.0296	92.1722	False Positive	CGAGCGUCUUCGAUGCCUAtt	CGAGCGUCUACGAUGCCUAtt	CGAGCGUCAAGGAUGCCUAtt	GCUCCUCCGCUGUGAGUAAtt	-
PLXDC1	PLXDC1	TGAGTAGCTGTGAGCATCC	GAGTAG	12.7189	15.3567	6.44106e-07	3.03353e-05	TRUE	59.2489	110.136	False Positive	GGAUGCUCACAGCUACUCAtt	GGAUGCUCAGAGCUACUCAtt	GGAUGCUCUGUGCUACUCAtt	GCCAUCCACCGUAGGUAUAtt	plexin domain containing 1
hCG_2045830	NA	AAAGGCACTCCCATGATTT	AAGGCA	19.7632	34.8723	7.42095e-09	6.44916e-07	TRUE	71.1762	NA	False Positive	AAAUCAUGGGAGUGCCUUUtt	AAAUCAUGGCAGUGCCUUUtt	AAAUCAUGCCUGUGCCUUUtt	GUUGUAGACGAGACCUAUUtt	-
C4orf21	C4orf21	TGACATCCAAGAGATCGGC	GACATC	16.5991	39.064	2.93123e-07	1.5069e-05	TRUE	73.4214	73.8147	False Positive	GCCGAUCUCUUGGAUGUCAtt	GCCGAUCUCAUGGAUGUCAtt	GCCGAUCUGAAGGAUGUCAtt	GCUUACGGAUCGGUCUUCAtt	chromosome 4 open reading frame 21
LHX1	LHX1	TTGGGTGTAGCAGCGAAGG	TGGGTG	17.4808	33.9166	7.4897e-13	2.52021e-10	TRUE	96.1152	99.4301	False Positive	CCUUCGCUGCUACACCCAAtt	CCUUCGCUGGUACACCCAAtt	CCUUCGCUCGAACACCCAAtt	GGACCCACUCCCCUAUCAUtt	LIM homeobox 1
B3GNT7	B3GNT7	TCCTTGTTCATGCGGCTGT	CCTTGT	19.3866	40.7186	1.82418e-05	0.000448368	TRUE	77.2372	102.46	False Positive	ACAGCCGCAUGAACAAGGAtt	ACAGCCGCAAGAACAAGGAtt	ACAGCCGCUACAACAAGGAtt	GAACCAAAGCCGGUACAGAtt	UDP-GlcNAc:betaGal beta-1,3-N-acetylglucosaminyltransferase 7
LOC646570	NA	ATGGTAGTTTCAGACATGG	TGGTAG	23.8484	45.2901	5.84255e-13	2.24477e-10	TRUE	44.3043	82.3687	False Positive	CCAUGUCUGAAACUACCAUtt	CCAUGUCUGUAACUACCAUtt	CCAUGUCUCUUACUACCAUtt	GCCACAAUCCGUUUAAUCAtt	-
PPAP2C	PPAP2C	TAGTTGTTGAAGTCCGAGC	AGTTGT	14.5577	59.4776	0.00169827	0.0155215	FALSE	53.0767	83.6428	False Positive	GCUCGGACUUCAACAACUAtt	GCUCGGACUACAACAACUAtt	GCUCGGACAAGAACAACUAtt	GCCUAACAUGACUCUACGAtt	phosphatidic acid phosphatase type 2C
LOC645504	NA	TAAGGCTCTCTCGTCCACC	AAGGCT	24.4032	35.3683	5.42591e-05	0.00107052	TRUE	48.8472	93.0595	False Positive	GGUGGACGAGAGAGCCUUAtt	GGUGGACGACAGAGCCUUAtt	GGUGGACGUCUGAGCCUUAtt	GCGAUAGGCGGACAUGUGAtt	-
ZFP36L2	ZFP36L2	TGAAGTCCCAAACTCATCG	GAAGTC	19.7987	31.0752	1.43065e-05	0.000370347	TRUE	74.2902	95.9485	False Positive	CGAUGAGUUUGGGACUUCAtt	CGAUGAGUUAGGGACUUCAtt	CGAUGAGUAACGGACUUCAtt	GCUAGAGUCGACGGUUAUUtt	zinc finger protein 36, C3H type-like 2

## Sheet: Synthesized siRNA Sequences
U	Unmodified
C10	Complement of base 10
C911	Complement of bases 9-11
SC	Scrambled sequence
siRNA	Target	Passenger.Strand	Guide.Strand
B3GNT7-U	CAACAGCCGCAUGAACAAGGA	ACAGCCGCAUGAACAAGGAtt	UCCUUGUUCAUGCGGCUGUtg
B3GNT7-C10	CAACAGCCGCAAGAACAAGGA	ACAGCCGCAAGAACAAGGAtt	UCCUUGUUCUUGCGGCUGUtg
B3GNT7-C9-11	CAACAGCCGCUACAACAAGGA	ACAGCCGCUACAACAAGGAtt	UCCUUGUUGUAGCGGCUGUtg
B3GNT7-SC	CAGAACCAAAGCCGGUACAGA	GAACCAAAGCCGGUACAGAtt	UCUGUACCGGCUUUGGUUCtg
C4orf21-U	UGGCCGAUCUCUUGGAUGUCA	GCCGAUCUCUUGGAUGUCAtt	UGACAUCCAAGAGAUCGGCca
C4orf21-C10	UGGCCGAUCUCAUGGAUGUCA	GCCGAUCUCAUGGAUGUCAtt	UGACAUCCAUGAGAUCGGCca
C4orf21-C9-11	UGGCCGAUCUGAAGGAUGUCA	GCCGAUCUGAAGGAUGUCAtt	UGACAUCCUUCAGAUCGGCca
C4orf21-SC	UGGCUUACGGAUCGGUCUUCA	GCUUACGGAUCGGUCUUCAtt	UGAAGACCGAUCCGUAAGCca
EIF2S3-U	CGGCUUAUUGUUAUUAGAUCU	GCUUAUUGUUAUUAGAUCUtt	AGAUCUAAUAACAAUAAGCcg
EIF2S3-C10	CGGCUUAUUGUAAUUAGAUCU	GCUUAUUGUAAUUAGAUCUtt	AGAUCUAAUUACAAUAAGCcg
EIF2S3-C9-11	CGGCUUAUUGAAUUUAGAUCU	GCUUAUUGAAUUUAGAUCUtt	AGAUCUAAAUUCAAUAAGCcg
EIF2S3-SC	CGGGAUUUCUAUACGUUUAUU	GGAUUUCUAUACGUUUAUUtt	AAUAAACGUAUAGAAAUCCcg
hCG_1989844-U	AGCGAGCGUCUUCGAUGCCUA	CGAGCGUCUUCGAUGCCUAtt	UAGGCAUCGAAGACGCUCGct
hCG_1989844-C10	AGCGAGCGUCUACGAUGCCUA	CGAGCGUCUACGAUGCCUAtt	UAGGCAUCGUAGACGCUCGct
hCG_1989844-C9-11	AGCGAGCGUCAAGGAUGCCUA	CGAGCGUCAAGGAUGCCUAtt	UAGGCAUCCUUGACGCUCGct
hCG_1989844-SC	AGGCUCCUCCGCUGUGAGUAA	GCUCCUCCGCUGUGAGUAAtt	UUACUCACAGCGGAGGAGCct
hCG_2045830-U	UAAAAUCAUGGGAGUGCCUUU	AAAUCAUGGGAGUGCCUUUtt	AAAGGCACUCCCAUGAUUUta
hCG_2045830-C10	UAAAAUCAUGGCAGUGCCUUU	AAAUCAUGGCAGUGCCUUUtt	AAAGGCACUGCCAUGAUUUta
hCG_2045830-C9-11	UAAAAUCAUGCCUGUGCCUUU	AAAUCAUGCCUGUGCCUUUtt	AAAGGCACAGGCAUGAUUUta
hCG_2045830-SC	UAGUUGUAGACGAGACCUAUU	GUUGUAGACGAGACCUAUUtt	AAUAGGUCUCGUCUACAACta
LHX1-U	CGCCUUCGCUGCUACACCCAA	CCUUCGCUGCUACACCCAAtt	UUGGGUGUAGCAGCGAAGGcg
LHX1-C10	CGCCUUCGCUGGUACACCCAA	CCUUCGCUGGUACACCCAAtt	UUGGGUGUACCAGCGAAGGcg
LHX1-C9-11	CGCCUUCGCUCGAACACCCAA	CCUUCGCUCGAACACCCAAtt	UUGGGUGUUCGAGCGAAGGcg
LHX1-SC	CGGGACCCACUCCCCUAUCAU	GGACCCACUCCCCUAUCAUtt	AUGAUAGGGGAGUGGGUCCcg
LOC645504-U	CUGGUGGACGAGAGAGCCUUA	GGUGGACGAGAGAGCCUUAtt	UAAGGCUCUCUCGUCCACCag
LOC645504-C10	CUGGUGGACGACAGAGCCUUA	GGUGGACGACAGAGCCUUAtt	UAAGGCUCUGUCGUCCACCag
LOC645504-C9-11	CUGGUGGACGUCUGAGCCUUA	GGUGGACGUCUGAGCCUUAtt	UAAGGCUCAGACGUCCACCag
LOC645504-SC	CUGCGAUAGGCGGACAUGUGA	GCGAUAGGCGGACAUGUGAtt	UCACAUGUCCGCCUAUCGCag
LOC646570-U	CACCAUGUCUGAAACUACCAU	CCAUGUCUGAAACUACCAUtt	AUGGUAGUUUCAGACAUGGtg
LOC646570-C10	CACCAUGUCUGUAACUACCAU	CCAUGUCUGUAACUACCAUtt	AUGGUAGUUACAGACAUGGtg
LOC646570-C9-11	CACCAUGUCUCUUACUACCAU	CCAUGUCUCUUACUACCAUtt	AUGGUAGUAAGAGACAUGGtg
LOC646570-SC	CAGCCACAAUCCGUUUAAUCA	GCCACAAUCCGUUUAAUCAtt	UGAUUAAACGGAUUGUGGCtg
PCF11-U	AAGGCAUAUCCUGAUAAUCAU	GGCAUAUCCUGAUAAUCAUtt	AUGAUUAUCAGGAUAUGCCtt
PCF11-C10	AAGGCAUAUCCAGAUAAUCAU	GGCAUAUCCAGAUAAUCAUtt	AUGAUUAUCUGGAUAUGCCtt
PCF11-C9-11	AAGGCAUAUCGACAUAAUCAU	GGCAUAUCGACAUAAUCAUtt	AUGAUUAUGUCGAUAUGCCtt
PCF11-SC	AAGAUUACCGUCGUCAAUAUA	GAUUACCGUCGUCAAUAUAtt	UAUAUUGACGACGGUAAUCtt
PLXDC1-U	UCGGAUGCUCACAGCUACUCA	GGAUGCUCACAGCUACUCAtt	UGAGUAGCUGUGAGCAUCCga
PLXDC1-C10	UCGGAUGCUCAGAGCUACUCA	GGAUGCUCAGAGCUACUCAtt	UGAGUAGCUCUGAGCAUCCga
PLXDC1-C9-11	UCGGAUGCUCUGUGCUACUCA	GGAUGCUCUGUGCUACUCAtt	UGAGUAGCACAGAGCAUCCga
PLXDC1-SC	UCGCCAUCCACCGUAGGUAUA	GCCAUCCACCGUAGGUAUAtt	UAUACCUACGGUGGAUGGCga
POLR2A-U	CUCAUCGAGGGUCAUACUAUU	CAUCGAGGGUCAUACUAUUtt	AAUAGUAUGACCCUCGAUGag
POLR2A-C10	CUCAUCGAGGGACAUACUAUU	CAUCGAGGGACAUACUAUUtt	AAUAGUAUGUCCCUCGAUGag
POLR2A-C9-11	CUCAUCGAGGCAGAUACUAUU	CAUCGAGGCAGAUACUAUUtt	AAUAGUAUCUGCCUCGAUGag
POLR2A-SC	CUGGUAAACGCGUAUUUCACU	GGUAAACGCGUAUUUCACUtt	AGUGAAAUACGCGUUUACCag
POLR2B-U	AUGGAACGAGAUUGUCAGAUU	GGAACGAGAUUGUCAGAUUtt	AAUCUGACAAUCUCGUUCCat
POLR2B-C10	AUGGAACGAGAAUGUCAGAUU	GGAACGAGAAUGUCAGAUUtt	AAUCUGACAUUCUCGUUCCat
POLR2B-C9-11	AUGGAACGAGUAAGUCAGAUU	GGAACGAGUAAGUCAGAUUtt	AAUCUGACUUACUCGUUCCat
POLR2B-SC	AUGCGUGGGAAACUUAGUAAU	GCGUGGGAAACUUAGUAAUtt	AUUACUAAGUUUCCCACGCat
POLR2D-U	UCGUAGCUUGCUACUCCAGAA	GUAGCUUGCUACUCCAGAAtt	UUCUGGAGUAGCAAGCUACga
POLR2D-C10	UCGUAGCUUGCAACUCCAGAA	GUAGCUUGCAACUCCAGAAtt	UUCUGGAGUUGCAAGCUACga
POLR2D-C9-11	UCGUAGCUUGGAUCUCCAGAA	GUAGCUUGGAUCUCCAGAAtt	UUCUGGAGAUCCAAGCUACga
POLR2D-SC	UCGCUAGCCACGUCAAUGUAU	GCUAGCCACGUCAAUGUAUtt	AUACAUUGACGUGGCUAGCga
POLR2I-U	CUGCAUCUAUGUCAACAAGAU	GCAUCUAUGUCAACAAGAUtt	AUCUUGUUGACAUAGAUGCag
POLR2I-C10	CUGCAUCUAUGACAACAAGAU	GCAUCUAUGACAACAAGAUtt	AUCUUGUUGUCAUAGAUGCag
POLR2I-C9-11	CUGCAUCUAUCAGAACAAGAU	GCAUCUAUCAGAACAAGAUtt	AUCUUGUUCUGAUAGAUGCag
POLR2I-SC	CUGUACCAUACAGACUAGUUA	GUACCAUACAGACUAGUUAtt	UAACUAGUCUGUAUGGUACag
POLR2J3-U	UACCCAAUGCCUGUUUAUUCA	CCCAAUGCCUGUUUAUUCAtt	UGAAUAAACAGGCAUUGGGta
POLR2J3-C10	UACCCAAUGCCAGUUUAUUCA	CCCAAUGCCAGUUUAUUCAtt	UGAAUAAACUGGCAUUGGGta
POLR2J3-C9-11	UACCCAAUGCGACUUUAUUCA	CCCAAUGCGACUUUAUUCAtt	UGAAUAAAGUCGCAUUGGGta
POLR2J3-SC	UAGCUAUCUCGUUCUACACUA	GCUAUCUCGUUCUACACUAtt	UAGUGUAGAACGAGAUAGCta
PPAP2C-U	UCGCUCGGACUUCAACAACUA	GCUCGGACUUCAACAACUAtt	UAGUUGUUGAAGUCCGAGCga
PPAP2C-C10	UCGCUCGGACUACAACAACUA	GCUCGGACUACAACAACUAtt	UAGUUGUUGUAGUCCGAGCga
PPAP2C-C9-11	UCGCUCGGACAAGAACAACUA	GCUCGGACAAGAACAACUAtt	UAGUUGUUCUUGUCCGAGCga
PPAP2C-SC	UCGCCUAACAUGACUCUACGA	GCCUAACAUGACUCUACGAtt	UCGUAGAGUCAUGUUAGGCga
RPL36-U	GCGCGCCAUGGAGUUACUGAA	GCGCCAUGGAGUUACUGAAtt	UUCAGUAACUCCAUGGCGCgc
RPL36-C10	GCGCGCCAUGGUGUUACUGAA	GCGCCAUGGUGUUACUGAAtt	UUCAGUAACACCAUGGCGCgc
RPL36-C9-11	GCGCGCCAUGCUCUUACUGAA	GCGCCAUGCUCUUACUGAAtt	UUCAGUAAGAGCAUGGCGCgc
RPL36-SC	GCGAGGGUACUCGACUACUGA	GAGGGUACUCGACUACUGAtt	UCAGUAGUCGAGUACCCUCgc
RPS27A-U	AAGAAGAAGUCUUACACCACU	GAAGAAGUCUUACACCACUtt	AGUGGUGUAAGACUUCUUCtt
RPS27A-C10	AAGAAGAAGUCAUACACCACU	GAAGAAGUCAUACACCACUtt	AGUGGUGUAUGACUUCUUCtt
RPS27A-C9-11	AAGAAGAAGUGAAACACCACU	GAAGAAGUGAAACACCACUtt	AGUGGUGUUUCACUUCUUCtt
RPS27A-SC	AAGGUCAUUAACCGCUAACAA	GGUCAUUAACCGCUAACAAtt	UUGUUAGCGGUUAAUGACCtt
SON-U	AGCAGAUUUAGUGAGACCGUU	CAGAUUUAGUGAGACCGUUtt	AACGGUCUCACUAAAUCUGct
SON-C10	AGCAGAUUUAGAGAGACCGUU	CAGAUUUAGAGAGACCGUUtt	AACGGUCUCUCUAAAUCUGct
SON-C9-11	AGCAGAUUUACACAGACCGUU	CAGAUUUACACAGACCGUUtt	AACGGUCUGUGUAAAUCUGct
SON-SC	AGGGCAUACCGAUUGUAGUUA	GGCAUACCGAUUGUAGUUAtt	UAACUACAAUCGGUAUGCCct
ZFP36L2-U	UCCGAUGAGUUUGGGACUUCA	CGAUGAGUUUGGGACUUCAtt	UGAAGUCCCAAACUCAUCGga
ZFP36L2-C10	UCCGAUGAGUUAGGGACUUCA	CGAUGAGUUAGGGACUUCAtt	UGAAGUCCCUAACUCAUCGga
ZFP36L2-C9-11	UCCGAUGAGUAACGGACUUCA	CGAUGAGUAACGGACUUCAtt	UGAAGUCCGUUACUCAUCGga
ZFP36L2-SC	UCGCUAGAGUCGACGGUUAUU	GCUAGAGUCGACGGUUAUUtt	AAUAACCGUCGACUCUAGCga

## Sheet: Control Experimental Results
	Unmodified			Scambled			C10			C911			Statistical Significance (green dot indicates < 0.01)
SYMBOL	Replicate 1	Replicate 2	Replicate 3	Replicate 1	Replicate 2	Replicate 3	Replicate 1	Replicate 2	Replicate 3	Replicate 1	Replicate 2	Replicate 3	Scrambled T-Test	C10 T-Test	C911 T-Test	Gold Standard Type
RPS27A	14.7335	16.0399	17.3337	57.8154	57.8771	65.028	64.3129	75.3204	87.5115	63.4984	59.7778	64.1793	0.00138079	0.0115904	6.42939e-05	True Positive
RPL36	18.8286	17.1011	23.764	89.2749	88.4199	95.6208	68.3165	61.0571	68.7748	71.1781	77.3979	79.9786	2.20714e-05	0.000181379	0.000108232	True Positive
PCF11	17.1307	16.8583	15.8209	90.55	85	88.4876	28.9243	33.6772	35.4526	94.6584	94.8148	110.792	0.000259651	0.0117624	0.00392005	True Positive
POLR2I	16.215	18.3003	18.0941	75.3167	71.9355	77.6651	33.9307	38.7398	42.9744	82.292	90.9511	90.4552	0.000178528	0.0112419	0.00095888	True Positive
EIF2S3	17.308	18.4609	17.6211	128.434	119.152	137.204	114.553	103.065	110.239	101.358	95.5696	106.479	0.00213698	0.00120975	0.00127449	True Positive
SON	12.0831	9.4378	9.62054	89.0017	92.23	91.5308	12.1018	11.6409	11.2248	65.8151	61.7546	62.6092	5.1094e-07	0.270395	1.18488e-05	True Positive
POLR2D	9.16034	9.96262	10.9148	59.225	65.9203	67.7119	92.5642	91.7661	105.273	91.616	90.0796	95.7295	0.00163137	0.00227919	0.000147853	True Positive
POLR2J3	19.2553	18.6287	21.5752	88.2376	83.2021	87.3626	105.538	100.269	117.047	149.405	136.573	142.509	2.53627e-05	0.00245654	0.000501968	True Positive
POLR2A	1.44039	1.86442	1.45875	146.608	176.56	152.479	17.0476	14.0064	15.1157	88.3576	86.4218	93.3247	0.00338506	0.00345152	0.000520451	True Positive
POLR2B	7.83181	7.25399	7.55152	84.3715	79.5096	83.2542	49.1164	52.6916	63.9459	53.236	51.657	55.4395	0.000330309	0.00858738	0.000440097	True Positive
hCG_2045830	13.4421	10.675	13.0433	33.2483	38.0859	39.8794	18.1628	17.0356	16.4626	16.9858	15.1189	16.6141	0.00218604	0.0143963	0.0263047	False Positive
hCG_1989844	13.1761	13.7537	16.5263	95.2443	91.9527	97.0703	16.4606	15.934	21.6604	21.5773	23.364	23.6972	5.35936e-06	0.186348	0.00425049	False Positive
LOC646570	21.5466	20.6636	24.0103	123.734	119.751	121.819	20.5838	21.9861	22.0337	22.0449	23.1923	28.4938	4.12475e-07	0.661645	0.343419	False Positive
PPAP2C	20.1028	19.5892	20.4333	100.276	90.2707	99.5539	19.8707	19.6112	24.3423	20.0137	18.6265	25.5222	0.00167106	0.507462	0.58902	False Positive
B3GNT7	14.8332	11.8693	15.2442	103.358	102.302	117.668	10.7681	12.4288	12.2277	13.9327	13.0582	16.7301	0.00192589	0.166553	0.719676	False Positive
PLXDC1	9.58429	6.62787	7.88399	67.4112	59.1601	60.3545	7.14253	7.78325	8.96194	9.30577	8.66022	7.11176	0.000917503	0.949005	0.777238	False Positive
LHX1	21.6989	22.0241	24.3582	96.3097	92.3412	103.847	21.3707	21.2729	24.1807	22.1511	24.5725	22.993	0.00119993	0.758111	0.646186	False Positive
LOC645504	23.4982	26.2735	26.4474	95.1504	98.2154	97.7591	31.5919	30.9674	33.0487	26.3783	23.9021	26.764	7.56571e-07	0.00749794	0.844003	False Positive
C4orf21	10.5649	13.8683	14.5598	93.0911	104.662	116.245	12.4368	16.8203	14.9539	11.0435	10.1462	14.609	0.00419126	0.381407	0.593663	False Positive
ZFP36L2	11.9423	15.9342	17.2567	163.939	133.719	159.152	12.6078	13.4523	16.1136	9.66788	11.2745	11.8973	0.00378153	0.637532	0.109265	False Positive
