# Supplementary material for: C911: A Bench-Level Control for Sequence Specific siRNA Off-Target Effects
Source: PLoS One. 2012 Dec 14;7(12):e51942. doi: 10.1371/journal.pone.0051942 (PMC3522603; doi:10.1371/journal.pone.0051942)
Supplement: File S1 — Code for CSA Plots. Computer code in the R programming language that was used to generate the CSA plots in Figure 2 and Plots S1. Requires the ggplot package. (R) [file pone.0051942.s003.R]

ggPlotOffTarget <-
function(geneID, assayResults, ylim=range(assayResults[,3]), ylab=colnames(assayResults)[3]) {
	# version of plotOffTarget for ggplot2, to display heptamer and hexamer matches
	# geneID - The Gene ID or Symbol to plot
	# assayResults - Data frame with Gene ID or Symbol in the first column, guide strand sequence in the second column,
    #                and assay result (z-score) in the thrid column
	# seed.table - seed table generated by findOffTarget function (findOffTarget(assayResults)$seeds)
	#
	require(ggplot2)
	cat("Plotting ", geneID, "...\n")
	colnames(assayResults) <- c("SYMBOL", "guide", "signal")
	assayResults$hexamer <- substr(assayResults[,2],2,7)
	assayResults$heptamer <- substr(assayResults[,2],2,8)
	heptamers <- assayResults$heptamer[assayResults[,1] == geneID]
	hexamers <- assayResults$hexamer[assayResults[,1] == geneID]
	toPlot <- assayResults[assayResults$hexamer %in% hexamers,]
	toPlot$type <- "Hexamer"
	toPlot$type[toPlot$heptamer %in% heptamers] <- "Heptamer"
	toPlot$type <- as.factor(toPlot$type)
	toPlot$Target <- factor(rep(1,length(toPlot$type)), levels=c(0,1), labels=c(geneID,"Other"))
	toPlot$Target[toPlot$SYMBOL == geneID] <- geneID
	geneScores <- assayResults[assayResults[,1] == geneID,3]
	# calculate a median for all scores
	scoreMedian <- median(assayResults[,3])
	p <- ggplot(toPlot, aes(hexamer, signal))
	p <- p + geom_jitter(position=position_jitter(width=.2), aes(size=type, colour=Target, alpha=Target, shape=Target)) + geom_hline(yintercept = scoreMedian, linetype = 2) + scale_size_manual(name="Seed Type",values=c(4,2)) + scale_alpha_manual(values=c(1,.5)) + scale_color_manual(values=c("red", "black")) + scale_shape_manual(values=c(17,16)) + ylab(ylab) + xlab("Seed Hexamer")
	p <- p + guides(colour = guide_legend(order = 1), shape = guide_legend(order = 1), alpha = guide_legend(order = 1), size = guide_legend(order = 2))
	p <- p + coord_cartesian(ylim=ylim)
	print(p) 
}
