# Supplementary material for: C911: A Bench-Level Control for Sequence Specific siRNA Off-Target Effects
Source: PubMed Central journal article supplement (PMC3522603; doi:10.1371/journal.pone.0051942), 2012-12-14

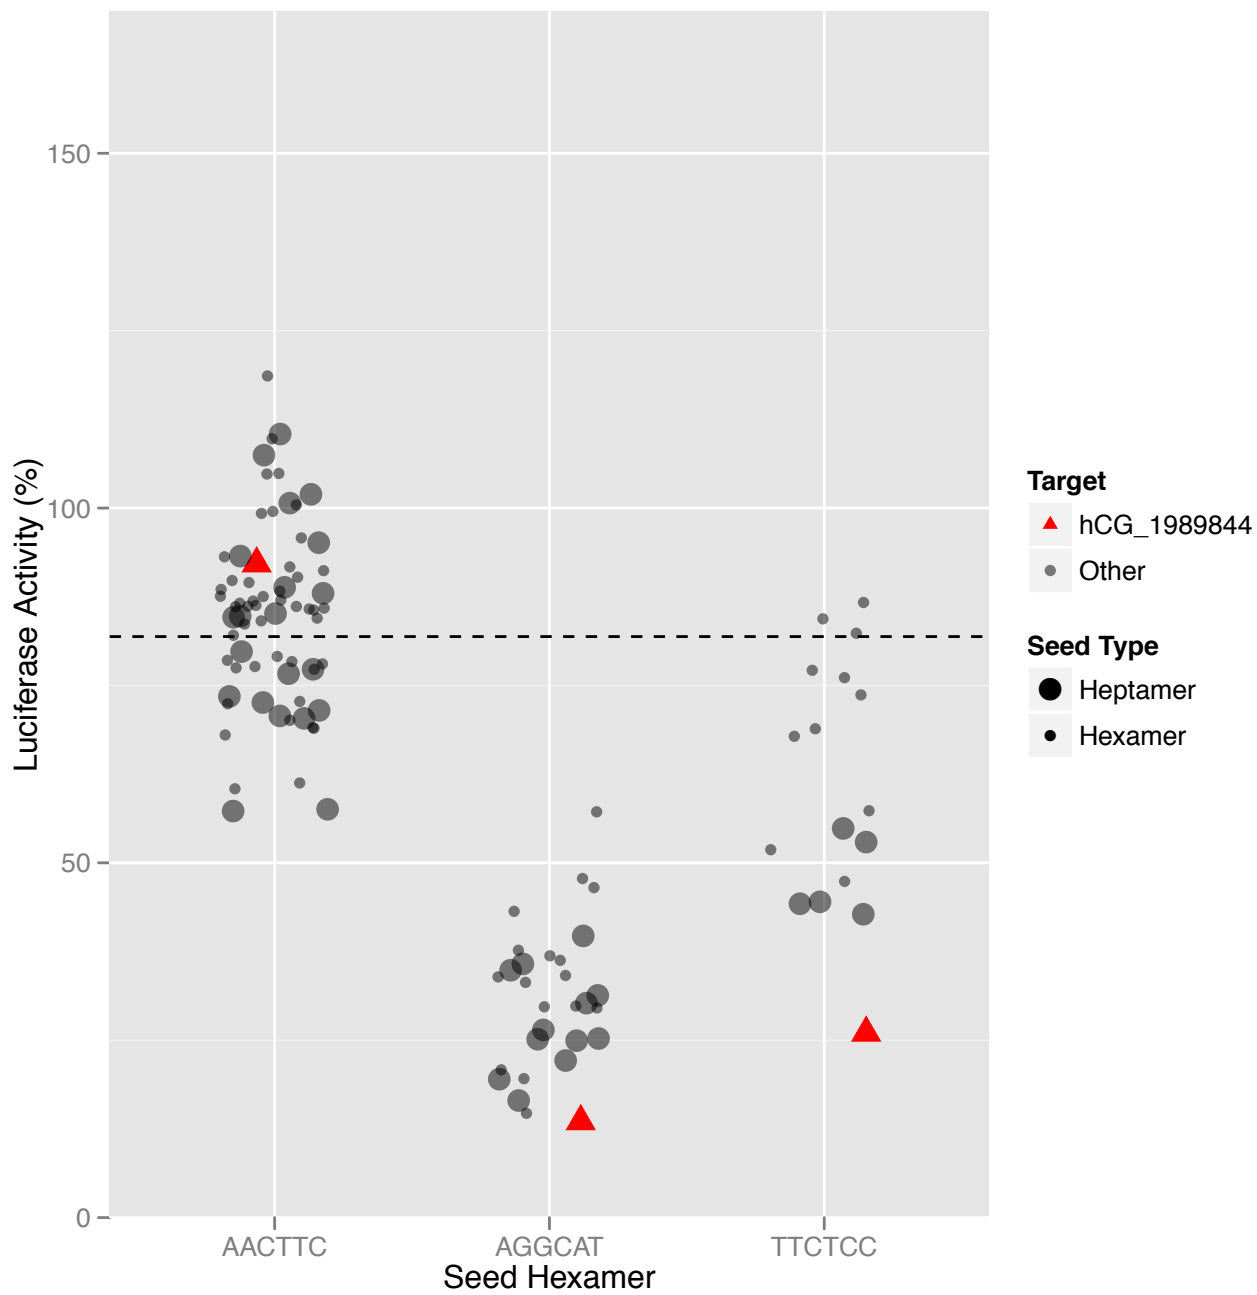



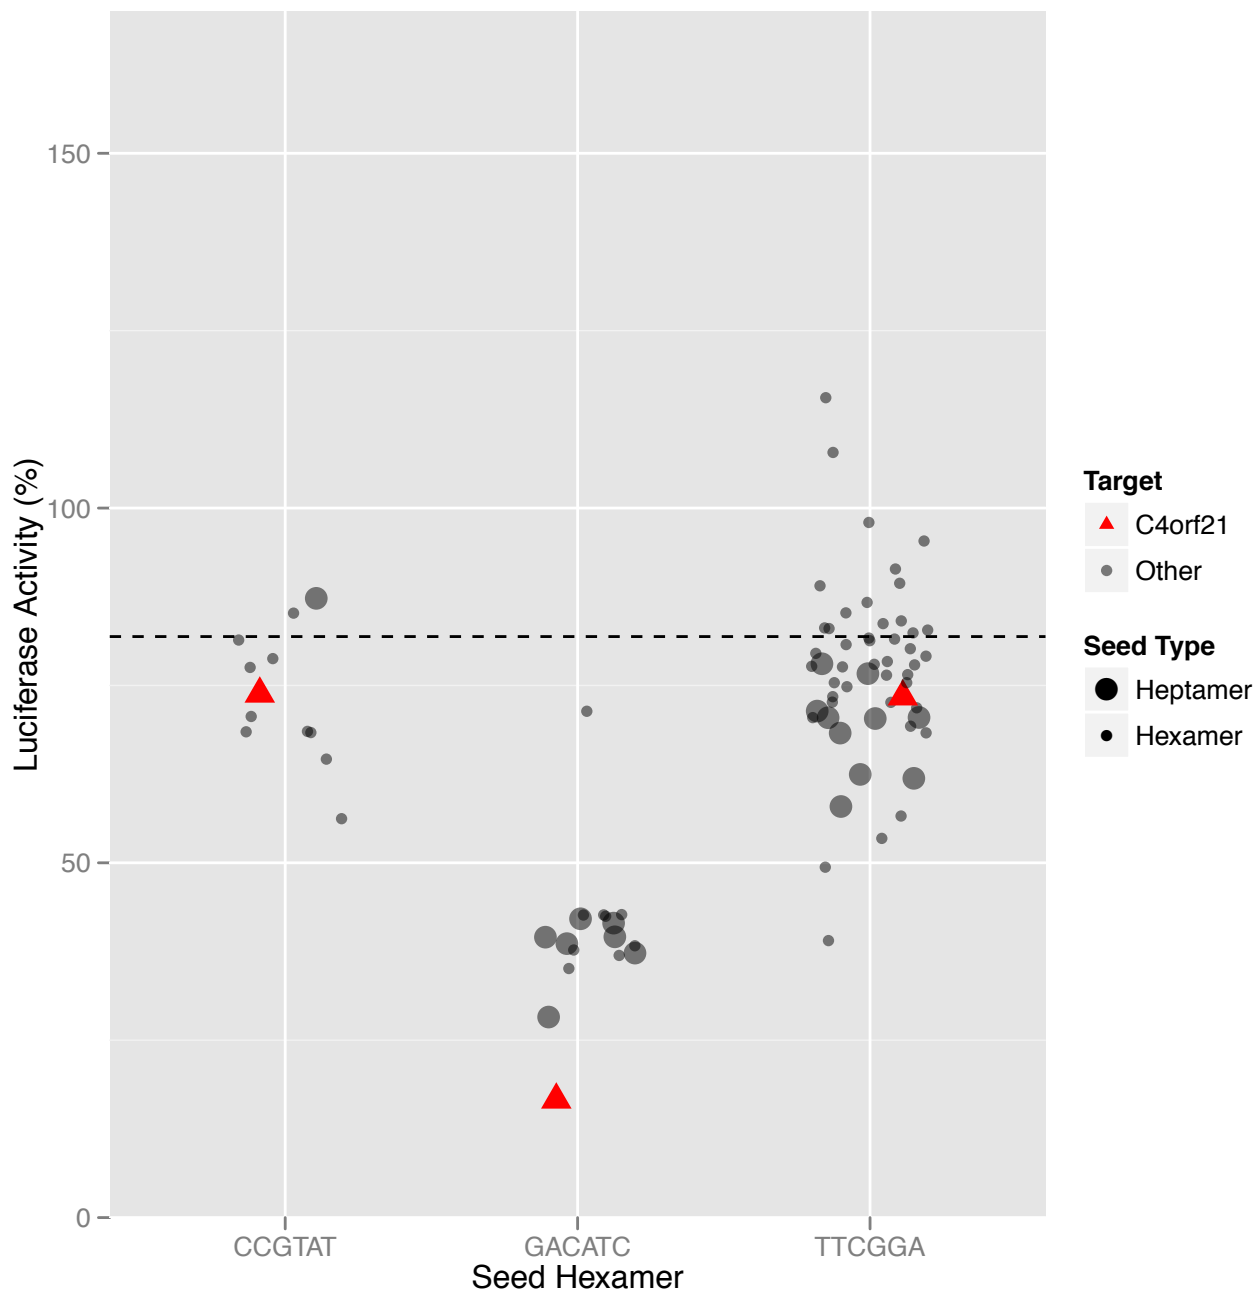



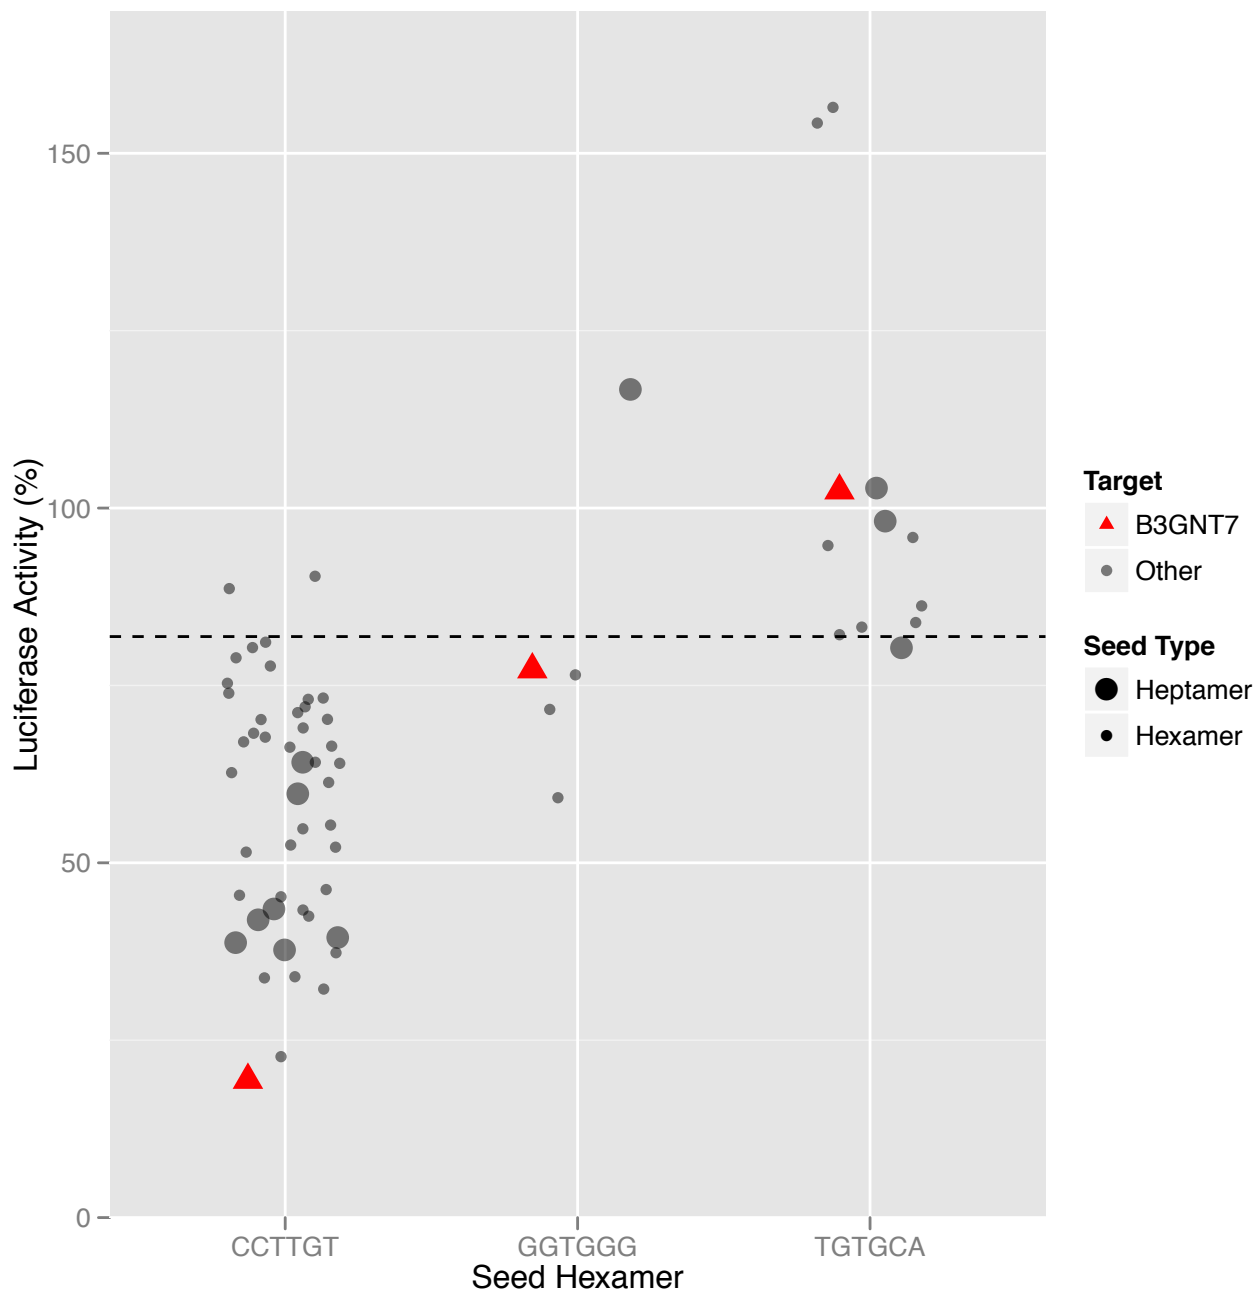

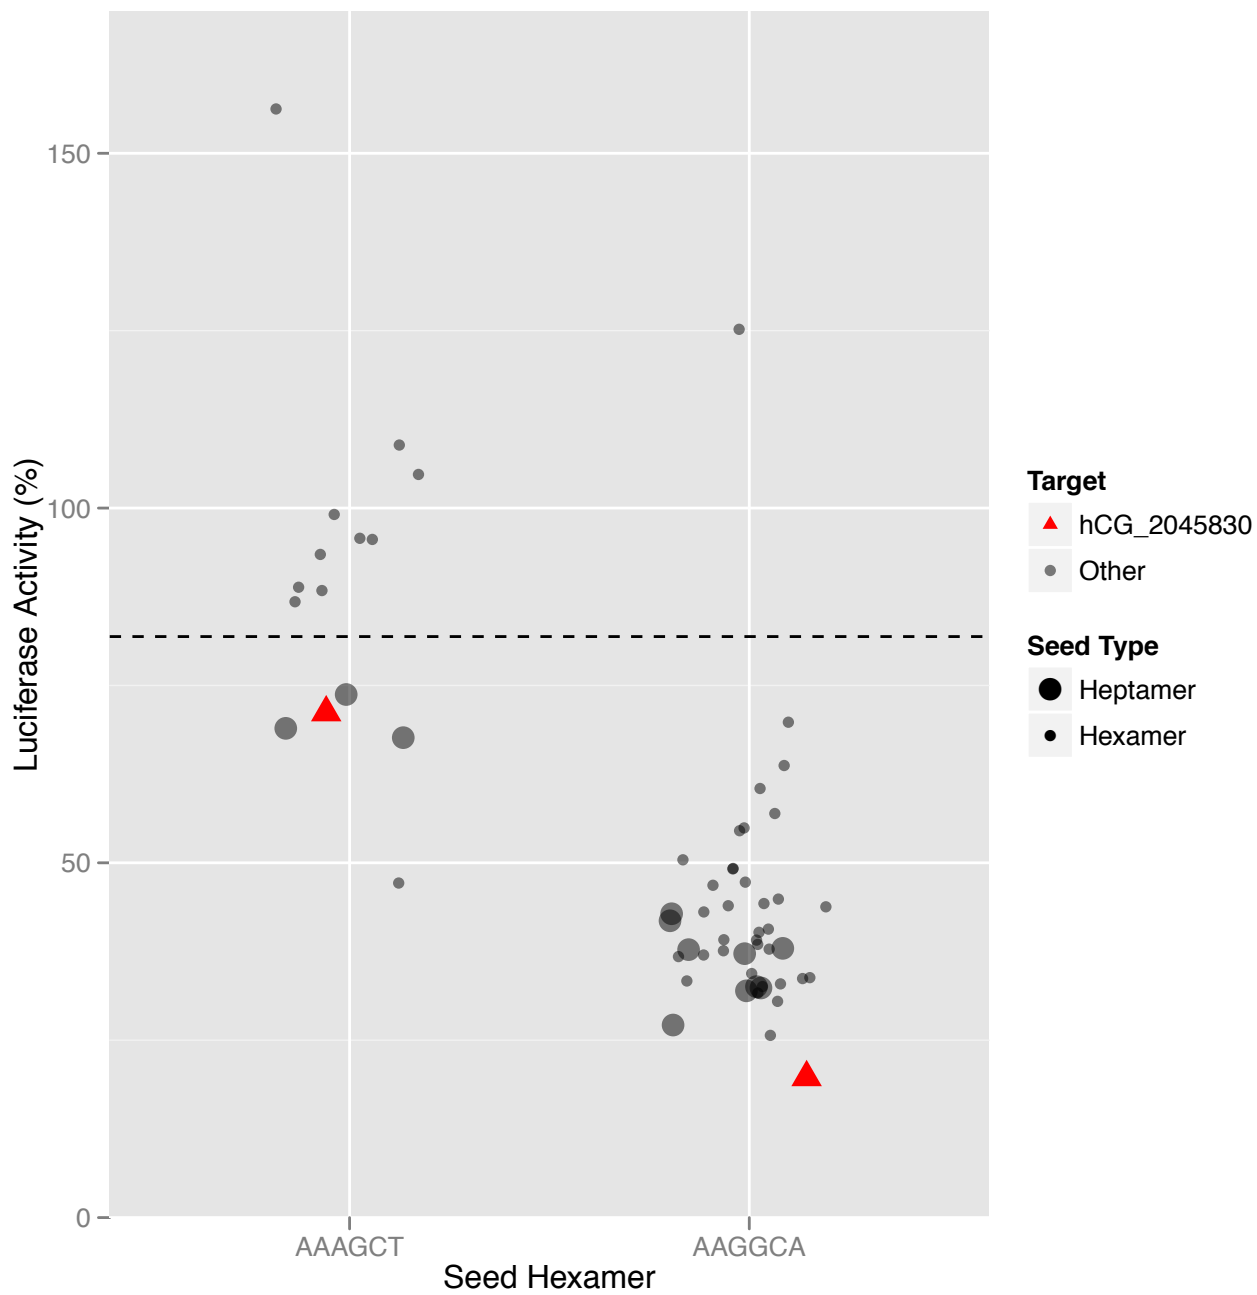

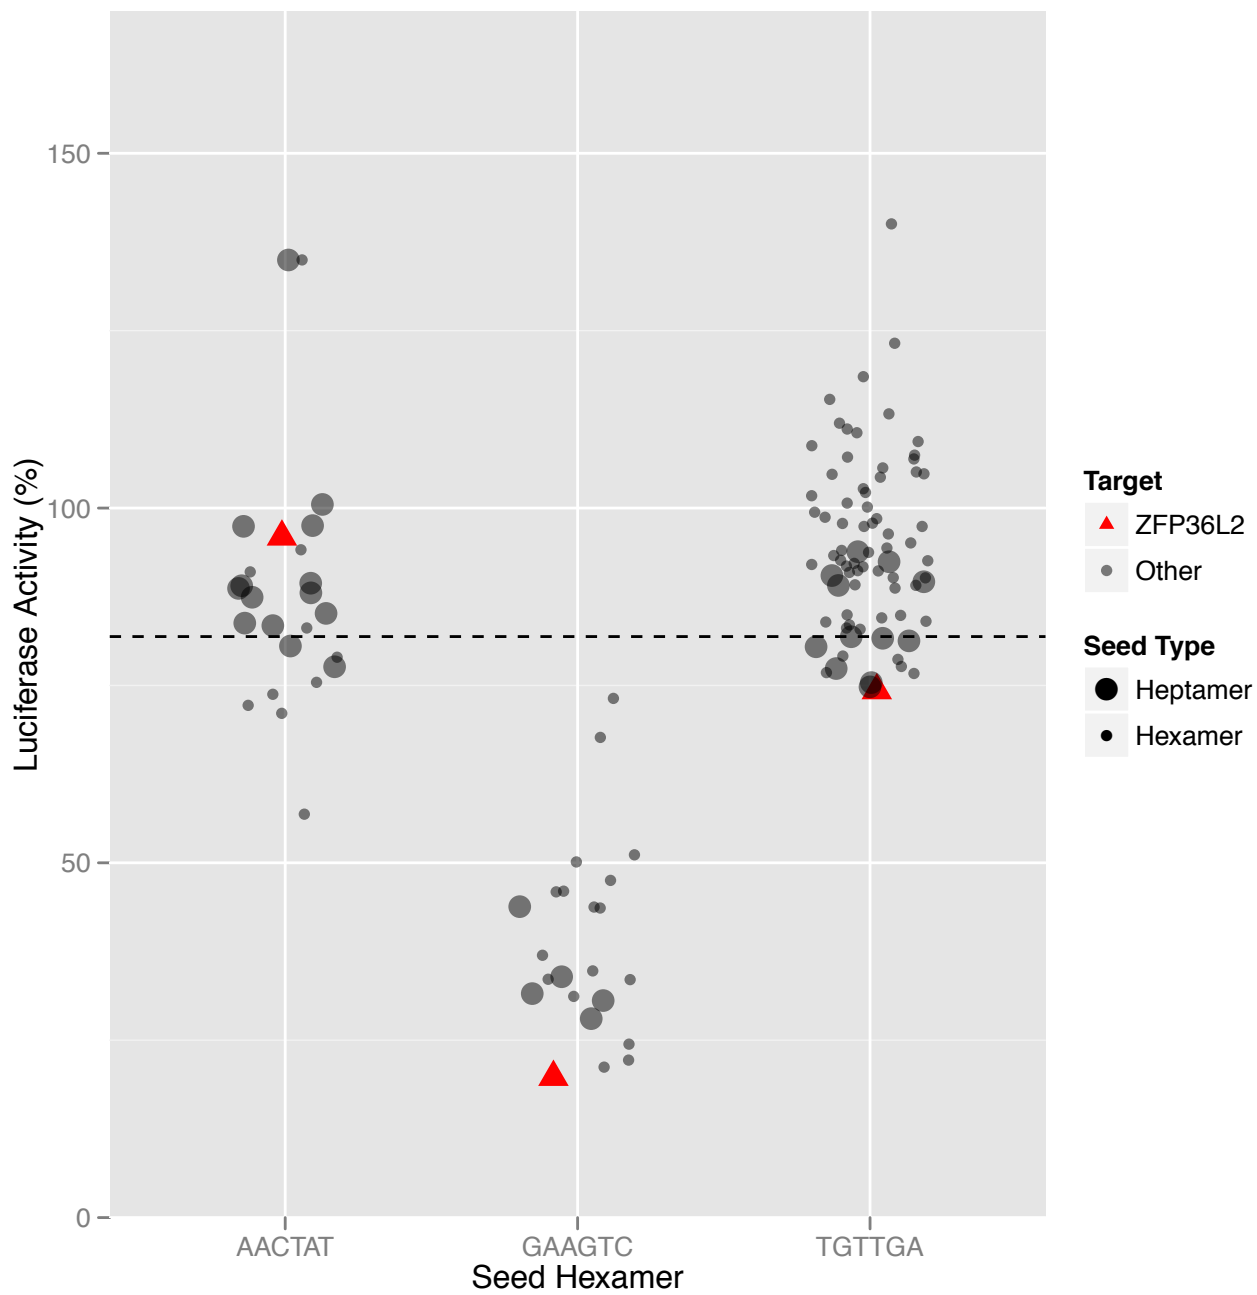



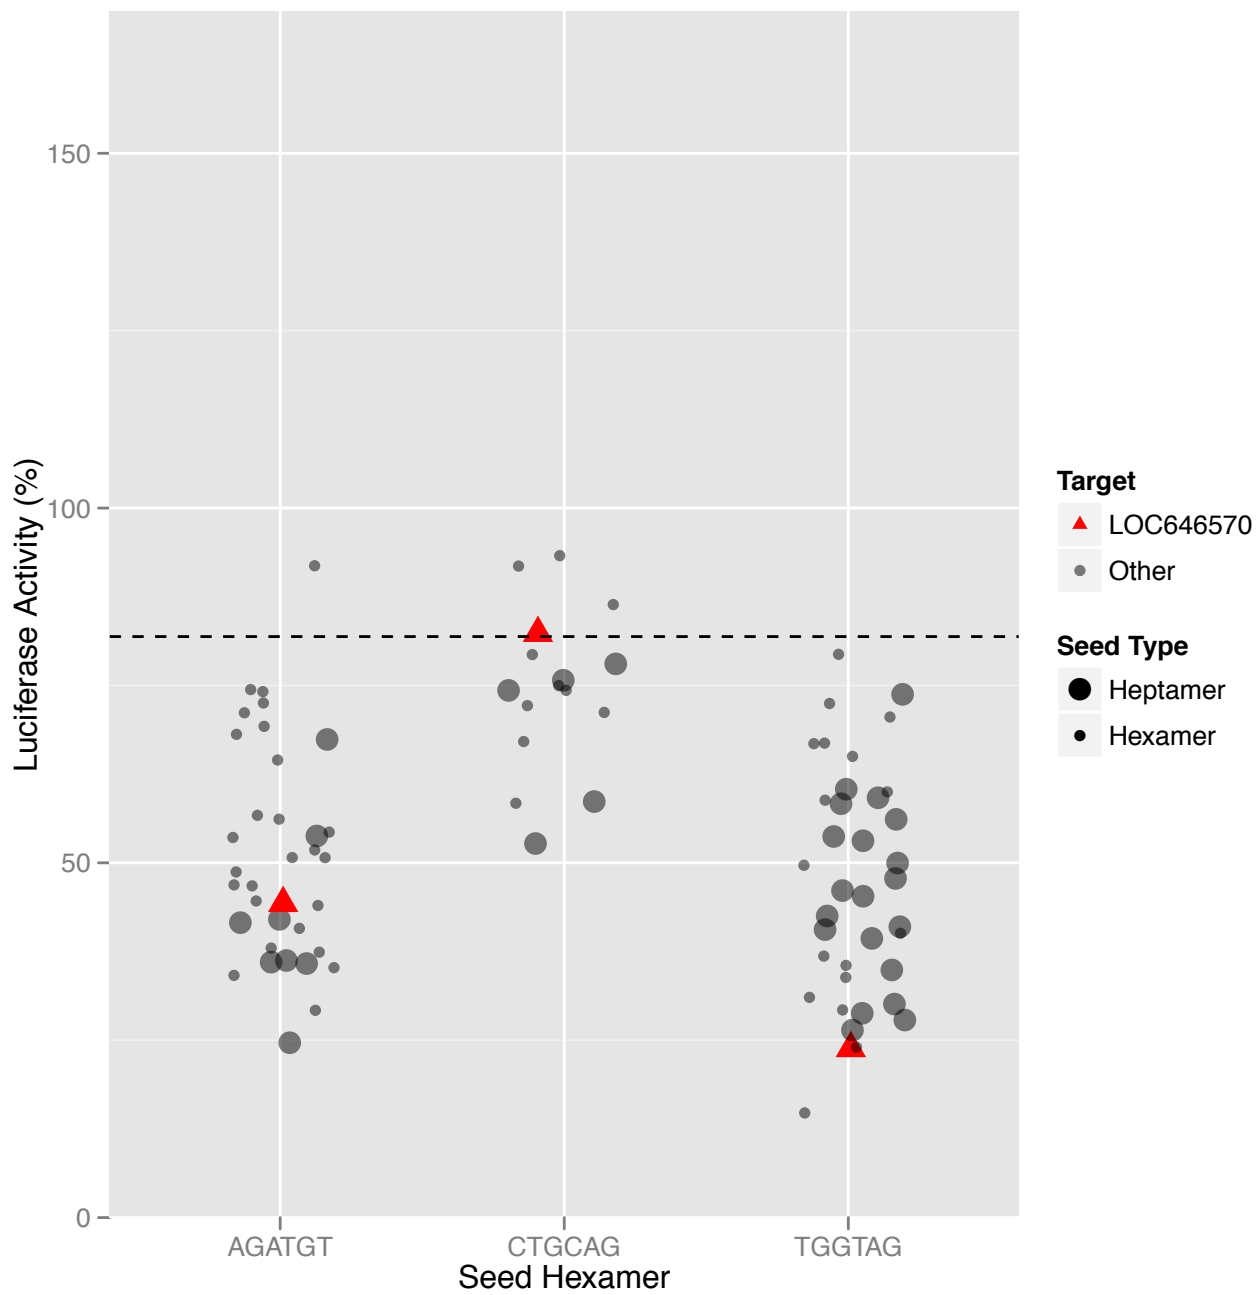

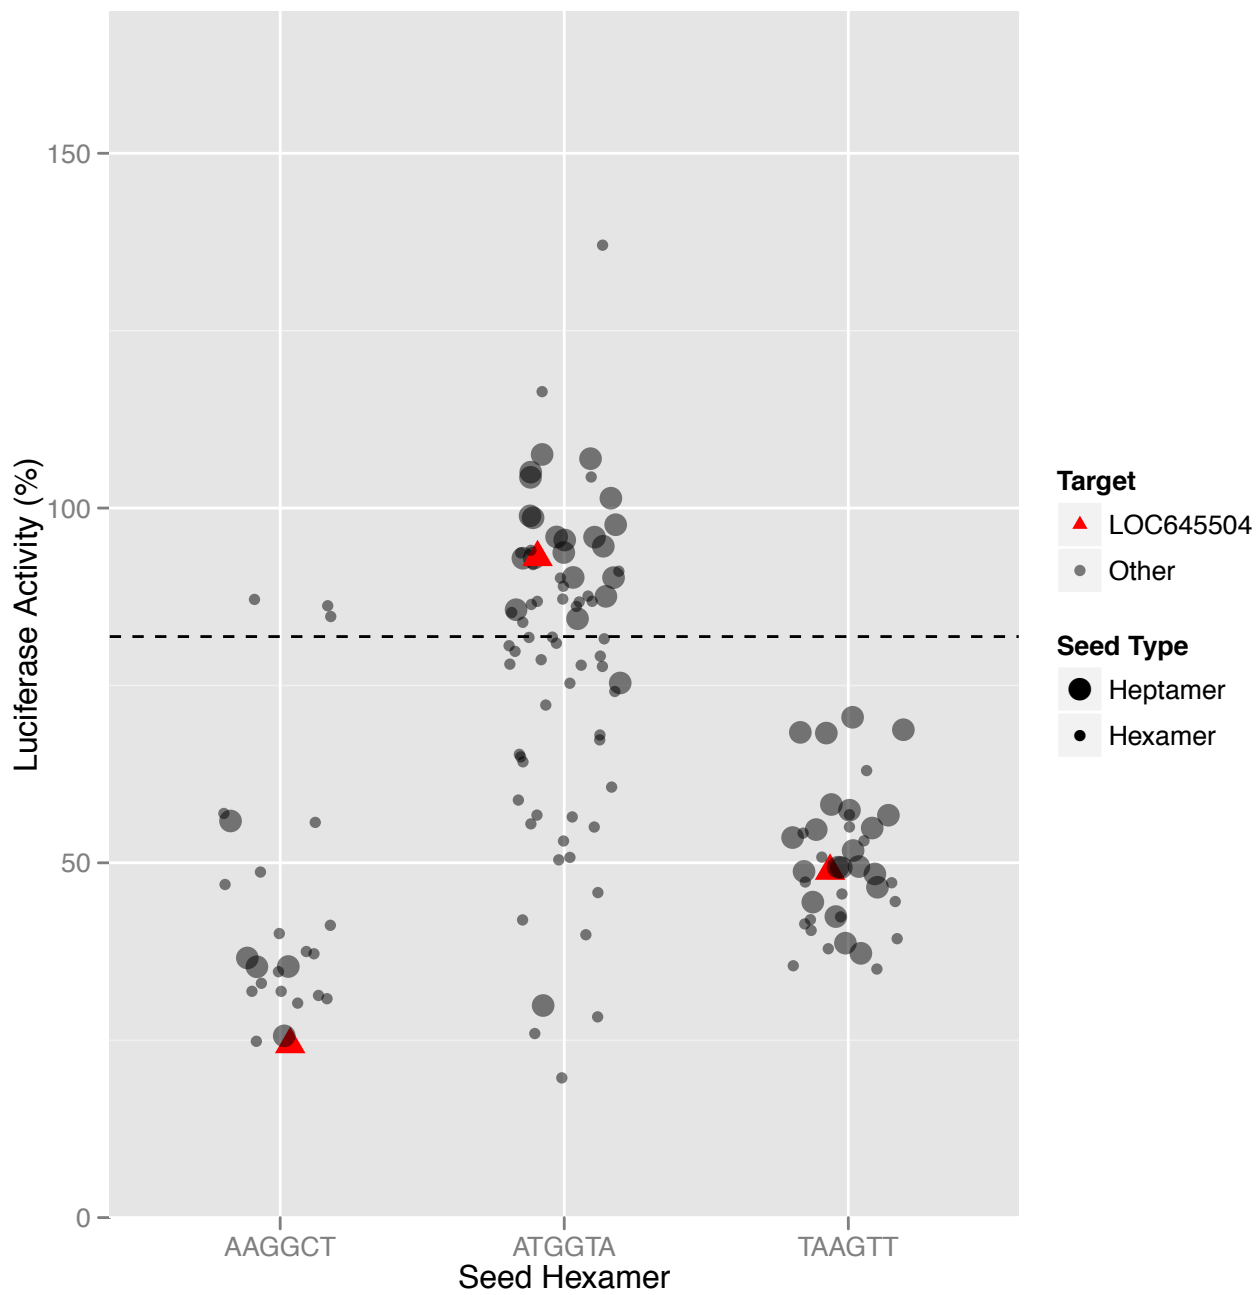

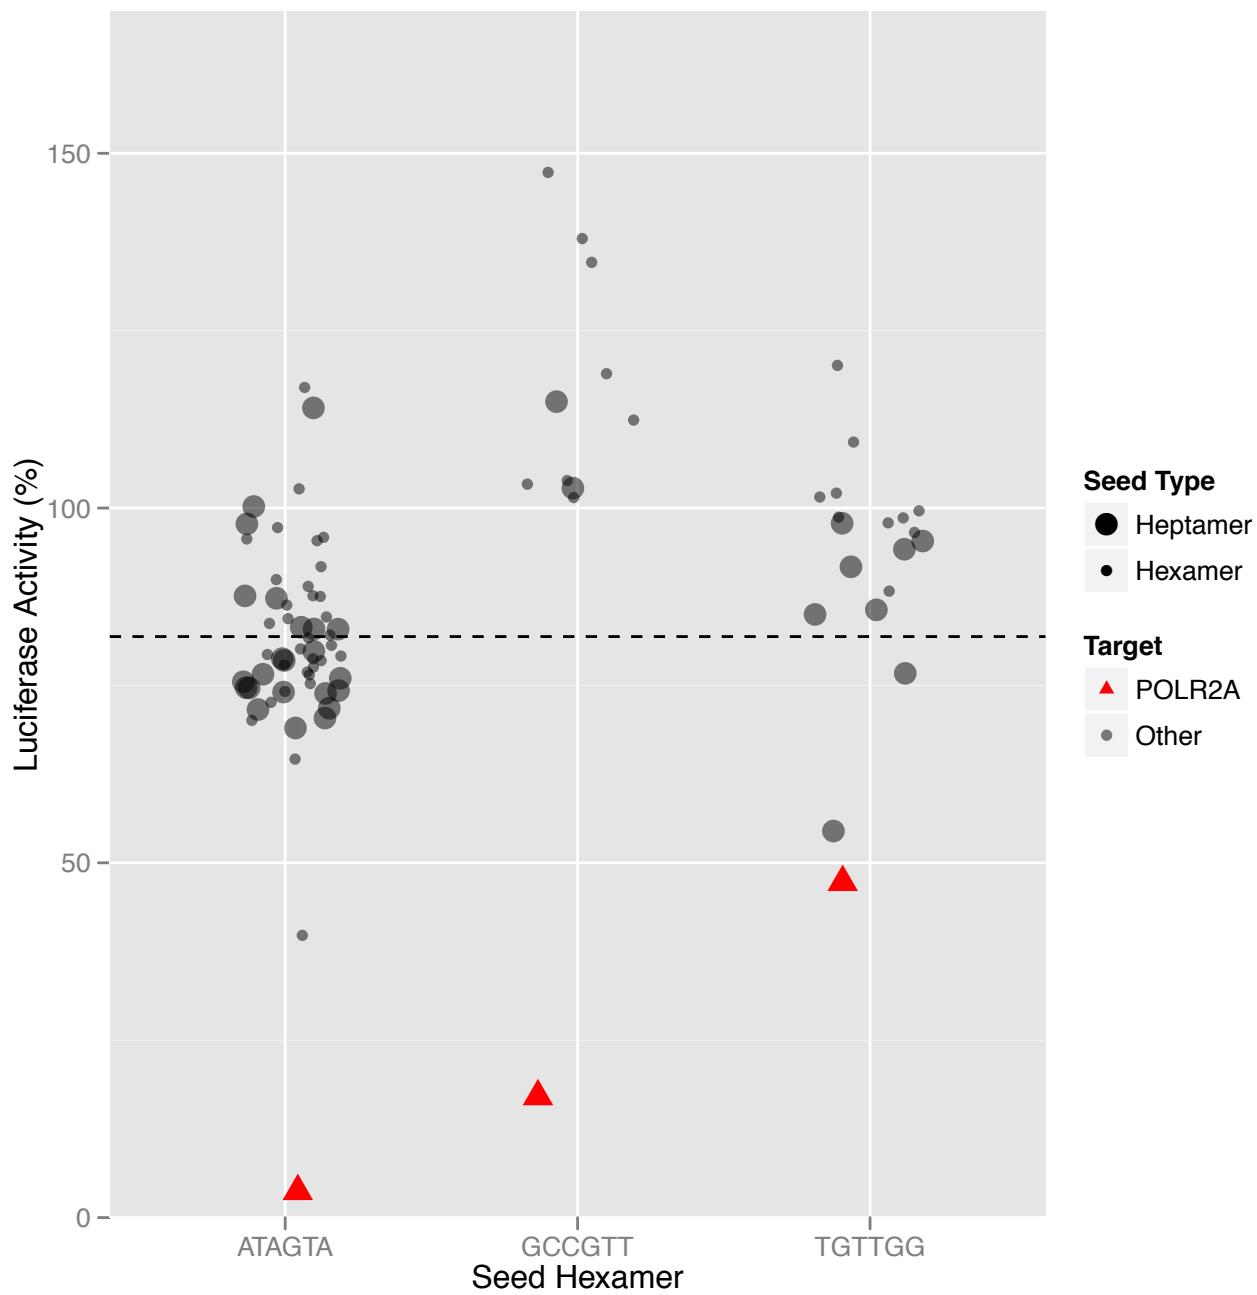

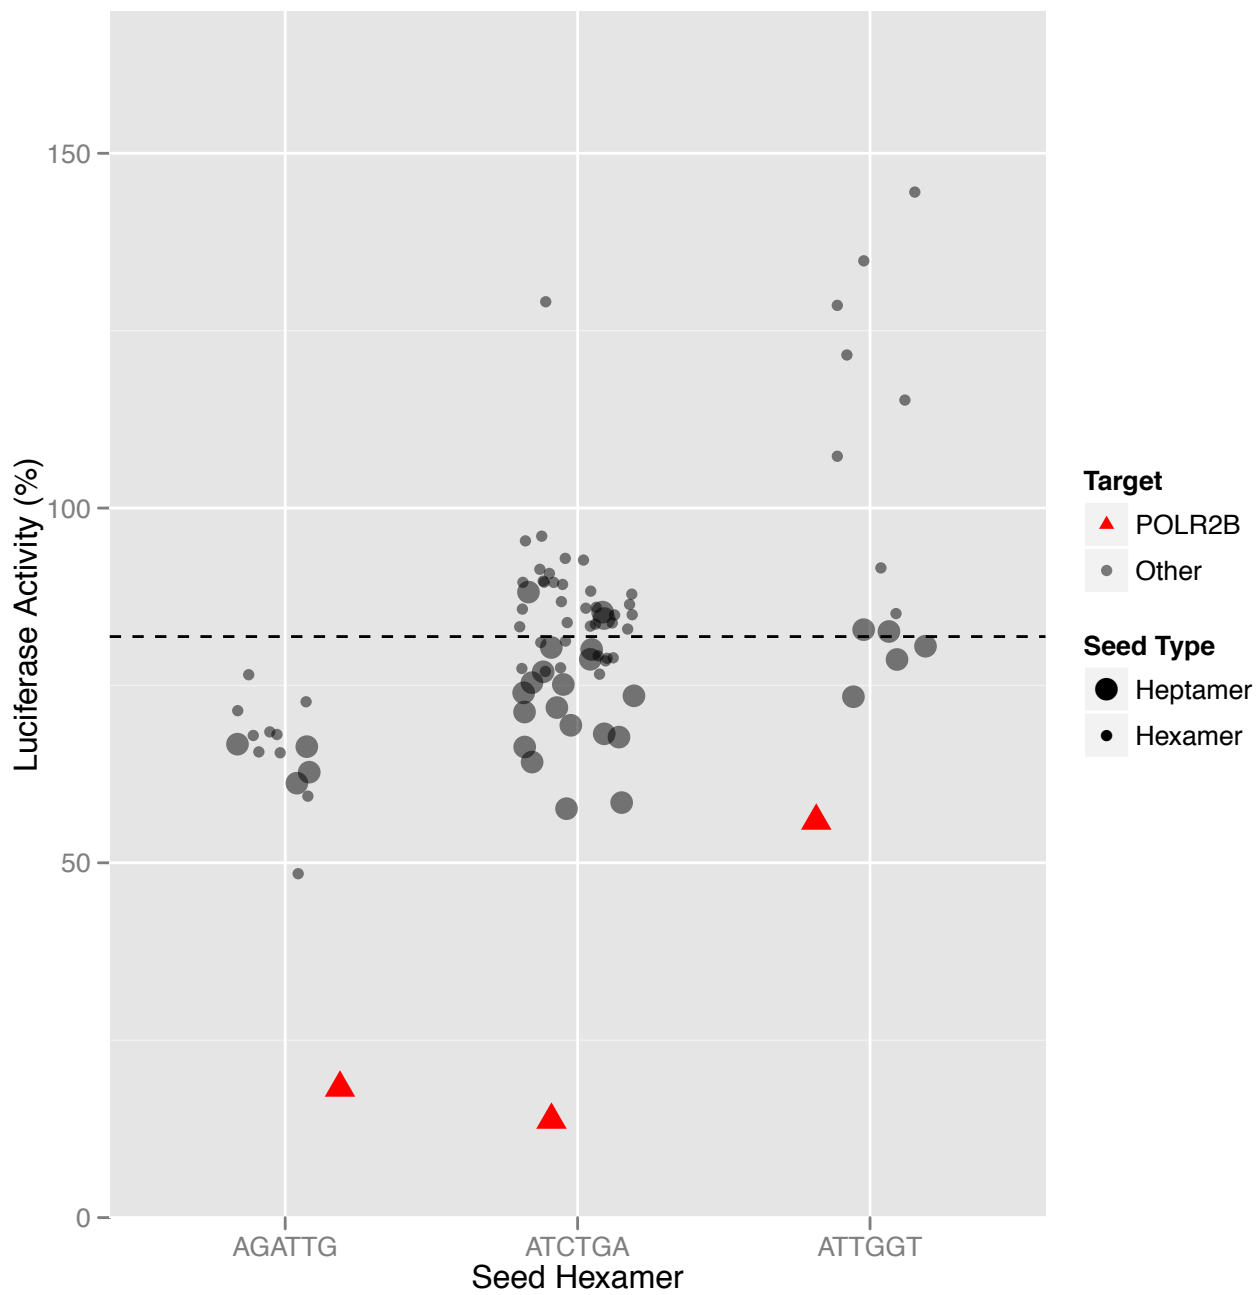



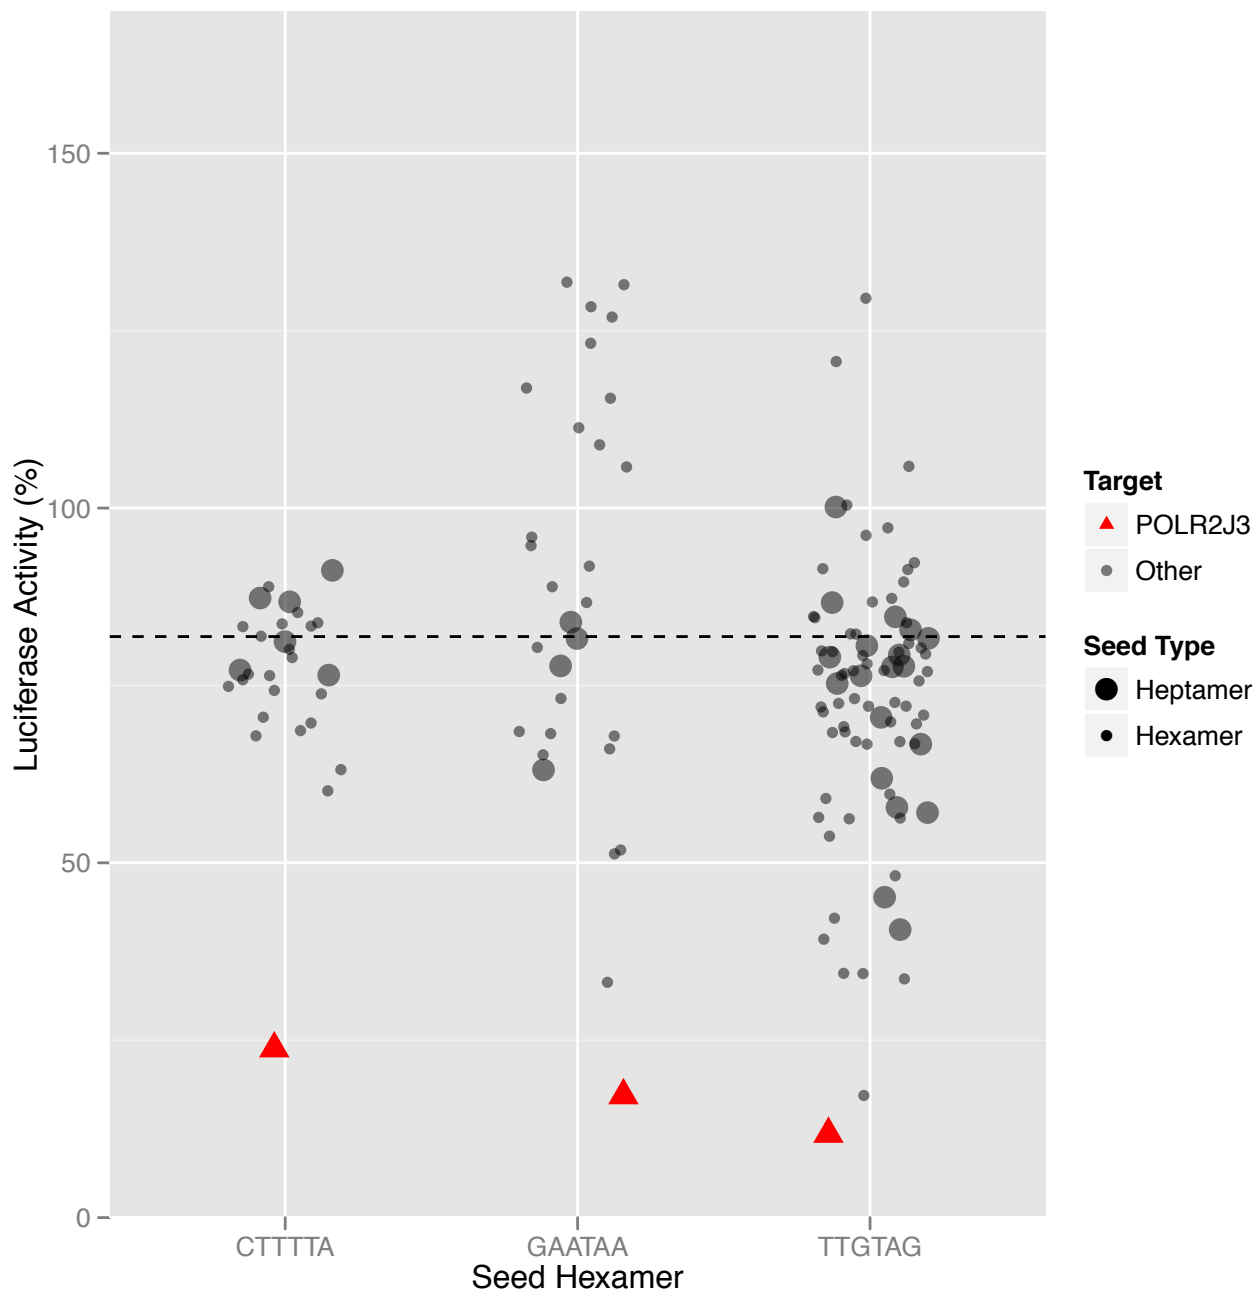

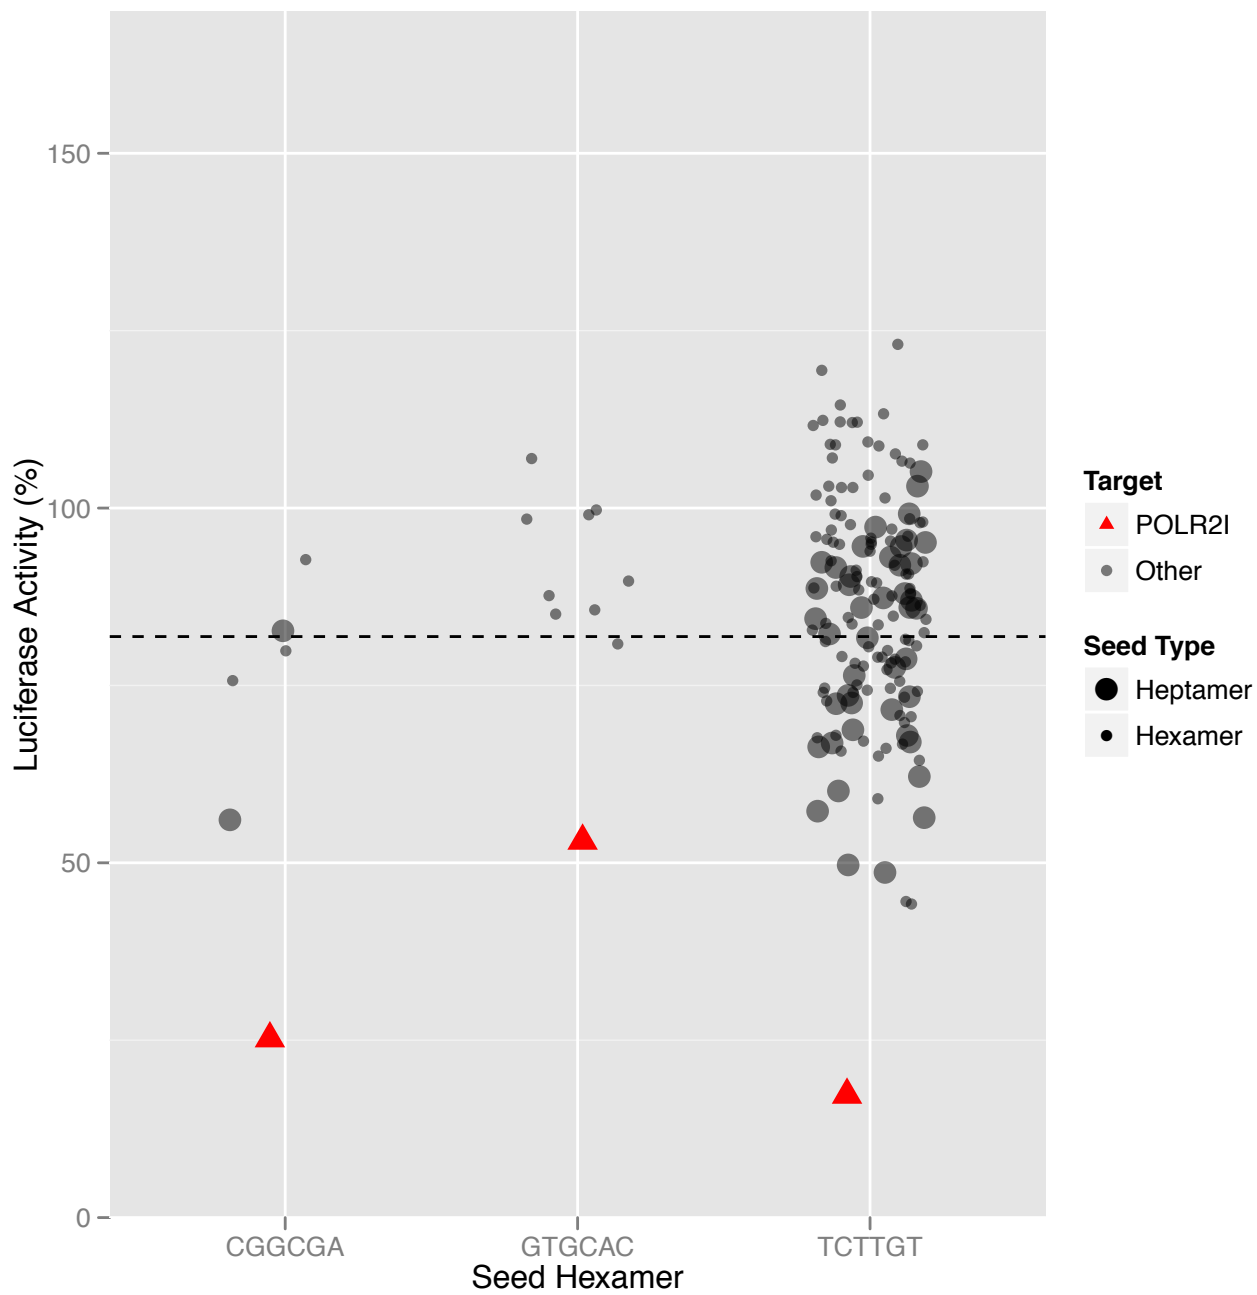

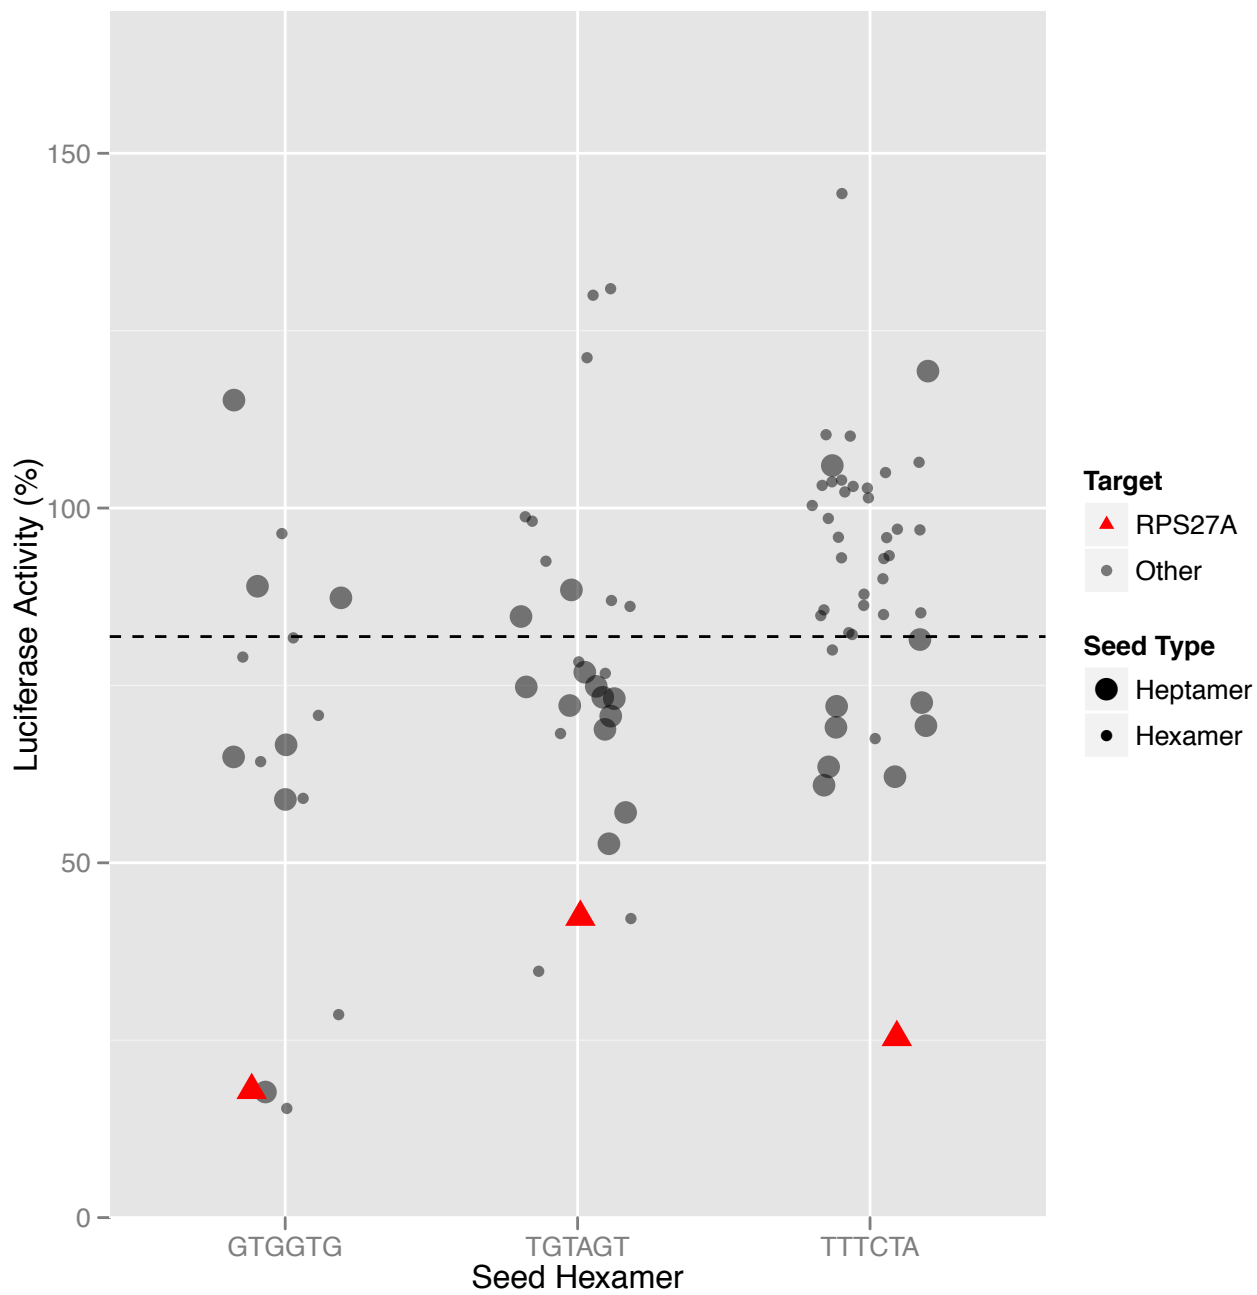





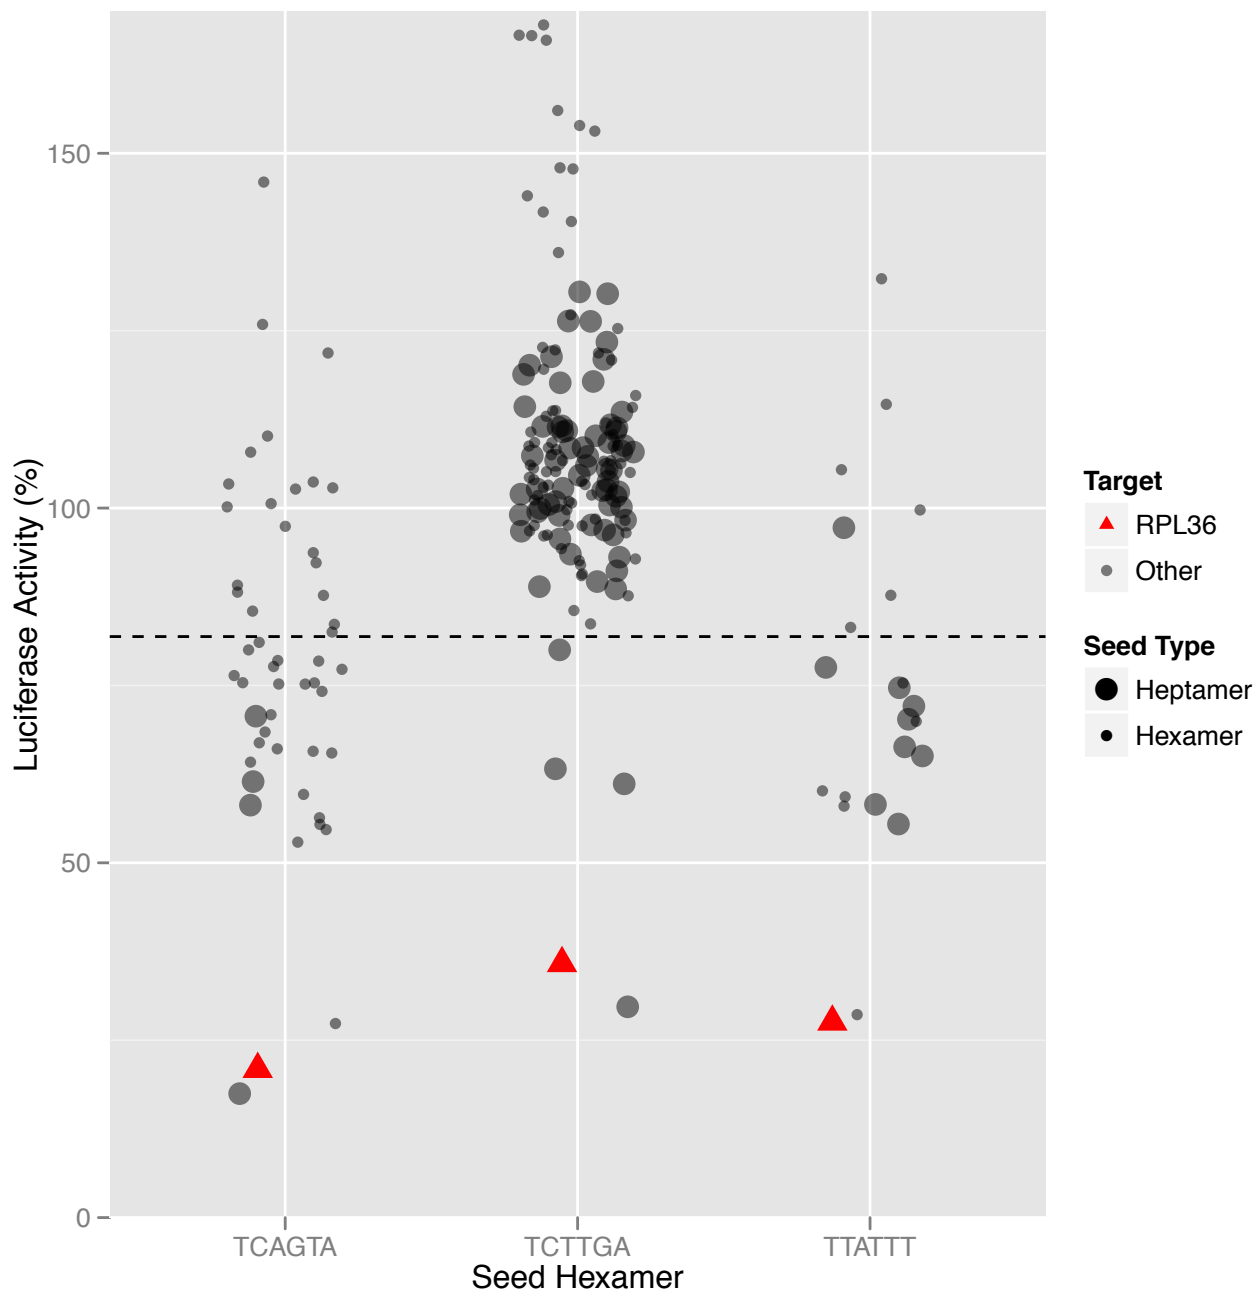

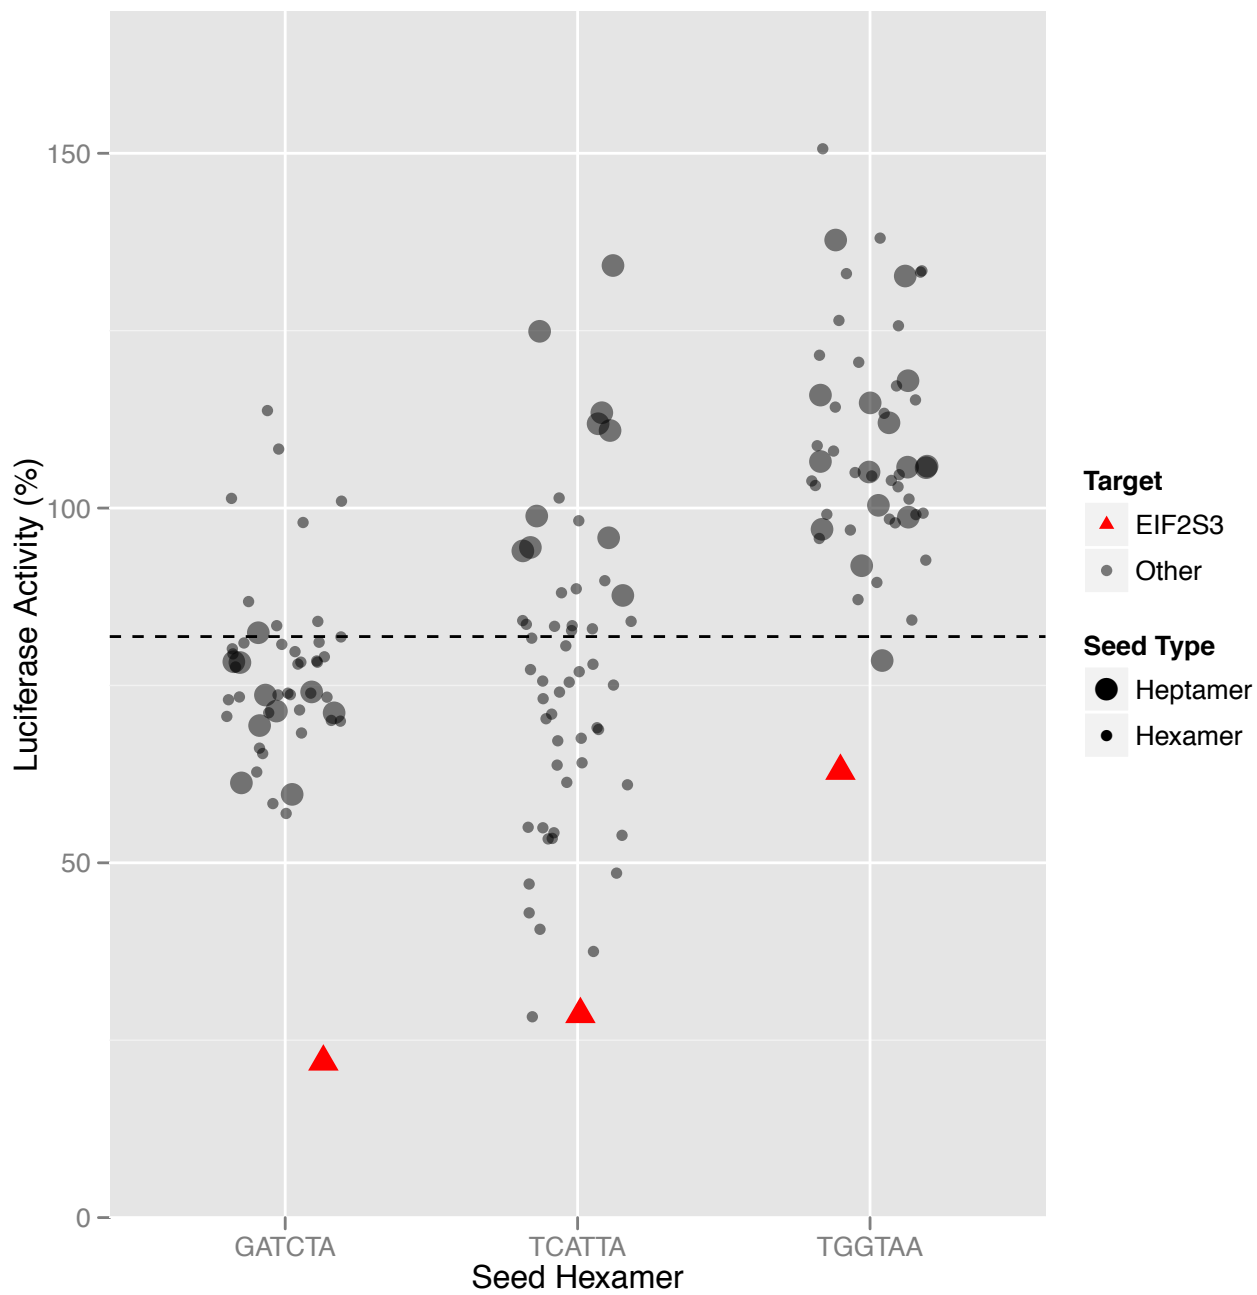

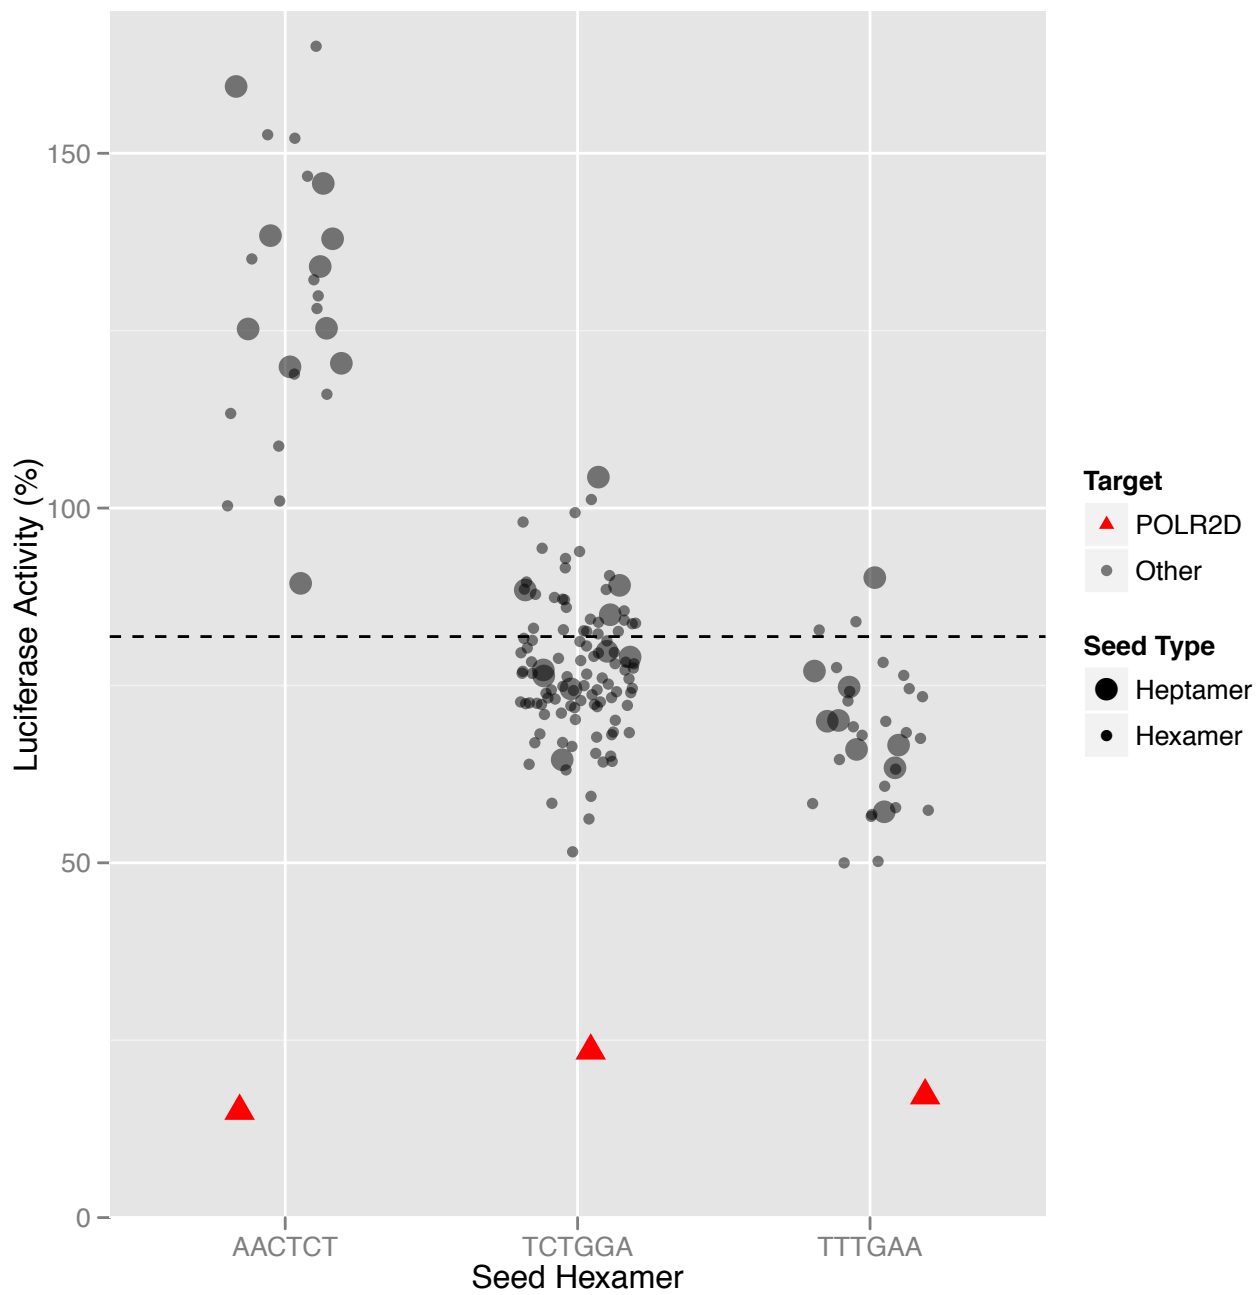

Supplement: pone.0051942.s002.pdf [file pone.0051942.s002.pdf]
